# Supplementary material for: Differential Gene Expression between Leaf and Rhizome in Atractylodes lancea: A Comparative Transcriptome Analysis
Source: PubMed Central journal article supplement (PMC4811964; doi:10.3389/fpls.2016.00348), 2016-03-30
Supplement: Image1.pdf [file Image1.pdf]

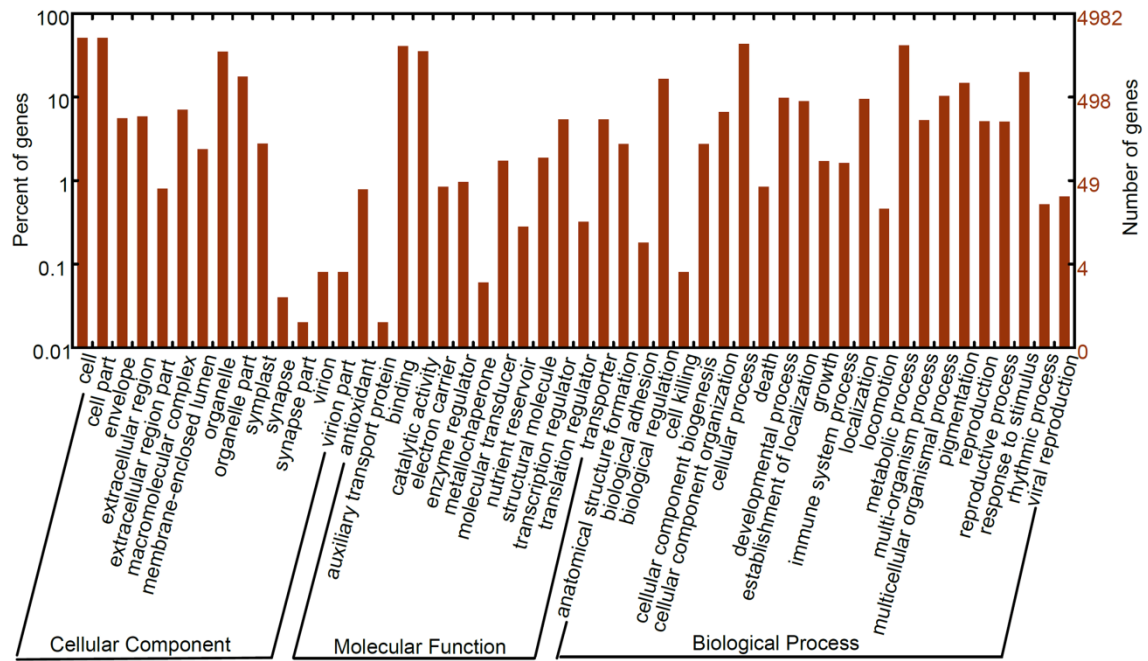

**Supplementary Figure S1** GO classification of DEGs.
