# Supplementary material for: Differential Gene Expression between Leaf and Rhizome in Atractylodes lancea: A Comparative Transcriptome Analysis
Source: PubMed Central journal article supplement (PMC4811964; doi:10.3389/fpls.2016.00348), 2016-03-30
Supplement: Image2.pdf [file Image2.pdf]

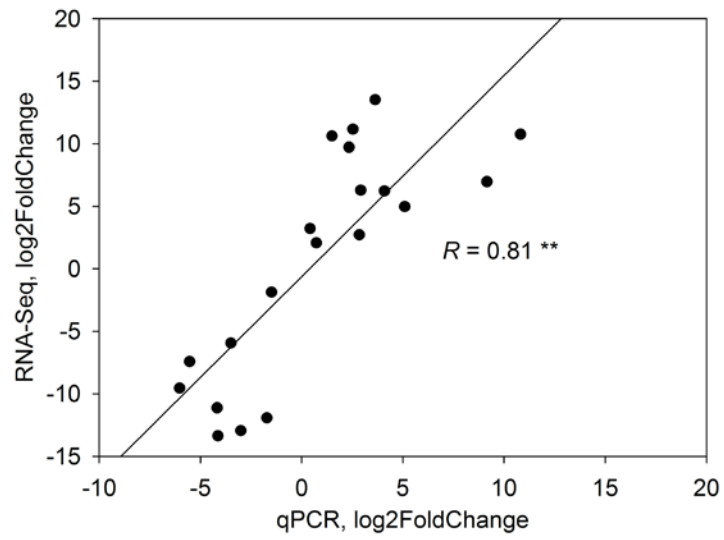

**Supplementary Figure S2** Scatter plot of the log2FoldChange values for 20 selected genes as estimated by RNA-seq and qPCR analyses. The correlation coefficient (R) is shown (\*\* $p < 0.01$ ).
